# Supplementary material for: Presentation of life-threatening invasive nontyphoidal Salmonella disease in Malawian children: A prospective observational study
Source: PLoS Negl Trop Dis. 2017 Dec 7;11(12):e0006027. doi: 10.1371/journal.pntd.0006027 (PMC5745124; doi:10.1371/journal.pntd.0006027)
Supplement: S1 Table — (XLS) [file pntd.0006027.s003.xls]

## Sheet: BactEpisodes (with changes) (2
StdYnm	Yrsage	Mthage	Tage(months)	Sex	Admdt	Bcdt	Bcrlt	c	cn	cro	cip	amp	sxt	mdr	Csftn	Csfdt	Csfrlt	Smeningitis	Csfmic	cc	cnc	croc	cipc	ampc	sxtc	csf_mdr	mdr_total	fvr	fvrdYs	cnv	cnvdYs	vmt	vmtdYs	drh	drhdYs	cgh	cghdYs	sob	sobdYs	HIVfinal	illhm	illhmdtl	drhhm	drhhmdtl	wt	ht	whz	whzmalnut	baz
1	2	3	27	2	2005-12-28	2005-12-31	1	1	1	1	1	2	1	0	N			0									0	Y	5	Y	1	N		N		N		N		N	N		N		11	85	-0.4	0	-0.29
33	12	7	151	1	2006-01-17	2006-01-17	4	1	1	1	1	1	1	0	N			0									0	Y	5	N		N		N		Y	5	Y	5	N	N		N		23	128			-2.63
42	9	3	111	2	2006-01-20	2006-01-20	4	1	1	1	1	1	1	0	N			0									0	Y	6	N		N		N		N		N			N		N		23	130			-1.69
51	10	6	126	2	2006-01-23	2006-01-23	1	1	1	1	1	2	2	0	N			0									0	Y	5	N		Y	2	Y	2	N		Y	5		N		N		12	113			-5.8
70	2	8	32	1	2006-01-30	2006-01-30	1	1	1	1	1	1	1	0	N			0									0	Y	3	N		N		N		N		N		N	N		N		11.5	91	-1.68	0	-1.58
74	2	8	32	2	2006-01-31	2006-01-31	4	1	1	1	1	1	1	0	N			0									0	Y	3																10
97	0	4	4	2	2006-02-11	2006-02-12	1	1	1	1	1	2	2	0	N			0									0	Y	7	N		Y	2	N		Y	2	Y	5	N	N		N		5.8	52	4.55	0	2.74
115	1	2	14	2	2006-02-18	2006-02-18	2	1	1	1	1	1	1	0	N			0									0	Y	14	N		N		N		N		N		N	N		N		7.6	70	-0.8	0	-0.4
129	0	1	1	2	2006-02-20	2006-02-20	3	1	1	1	1	1	1	0	N			0									0	Y	7							Y	3	Y	1						2.8
145	1	7	19	2	2006-03-01	2006-03-01	1	1	1	1	1	2	2	0				0									0																		8
160	2	2	26	1	2006-03-06	2006-03-06	4	1	1	1	1	1	1	0	N			0									0	Y	7	N		N		N		Y	9	Y	3	N	N		N		10	73	0.95	0	2.01
177	2	2	26	2	2006-03-16	2006-03-16	2	1	1	1	1	1	1	0	N			0									0	Y	2	N		N		N		Y	4	N		Y	N		N		7.6	69	-0.71	0	0.26
185	0	7	7	2	2006-03-18	2006-03-20	1	1	2	1	1	2	2	0	N			0									0	Y	1	Y	1	Y	1	N		Y	7	Y	1	N	Y	SISTERHADMALARIAX	N		7.7	66	0.57	0	0.5
187	3	7	43	1	2006-03-21	2006-03-21	4	1	1	1	1	1	1	0	N			0									0	Y	5	N		Y	2	N		Y	5	N			N		N		12.8	86	0.87	0	1.41
192	0	8	8	2	2006-03-22	2006-03-23	1	1	1	1	1	1	1	0	N			0									0	Y	7	N		Y	1	N		Y	2	Y							5.5
195	9	2	110	2	2006-03-24	2006-03-24	3	1	1	1	1	1	1	0	N			0									0	Y	7	N		N		N		N		N			N		N		17.8	115			-1.78
207	1	10	22	1	2006-03-29	2006-03-29	3	1	1	1	1	2	2	0	N			0									0	Y	14	N		N		N		Y		Y	2						9
209	1	4	16	1	2006-03-30	2006-03-30	1	1	1	1	1	2	2	0	N			0									0	Y	5	N		N		N		N		N		N	N		N		5.8	70	-4.6	2	-4.21
214	0	8	8	2	2006-04-04	2006-04-04	3	1	1	1	1	1	1	0	N			0									0	N		N		N		N		Y	7	Y	7						6.5
231	0	9	9	2	2006-04-19	2006-04-19	1	1	1	1	1	2	1	0	N			0									0	Y	5	N		N		N		Y	3	Y			N		N		8.5	76	-1.06	0	-1.42
233	2	5	29	1	2006-04-21	2006-04-21	2	1	1	1	1	1	2	0	N			0									0	Y	5	N		N		N		N		N			N		N		10	82	-1.15	0	-0.79
235	12	11	155	1	2006-04-03	2006-04-23	1	1	1	1	1	2	2	0	N			0									0	Y	7	N		Y	7	N		N		N		N	N		N		26	126			-0.99
237	0	7	7	2	2006-04-26	2006-04-26	1	1	1	1	1	1	1	0	Y	2006-04-26	6	0	1	1	1	1	1	2	2		0	Y	2	Y	1	N		N		N		N		N	N		N		5.6	67	-3.41	2	-3.45
238	0	8	8	2	2006-04-27	2006-04-27	3	1	1	1	1	1	1	0	Y	2006-04-27	5	0									0	Y		Y	1	N		N						N					6
251	1	3	15	2	2006-05-04	2006-05-04	1	1	1	1	1	1	1	0	N			0									0	Y	7	N		Y	1	N		Y	3	N			Y	TWINBROTHERHASSIM	N		4.6	62	-3.72	2	-3.47
252	1	3	15	1	2006-05-04	2006-05-04	1	1	1	1	1	2	1	0	N			0									0	Y	14	N		Y	14	N		Y	3	Y	3		Y	TWINSISTERHASSTM	N		5.4	63	-2.87	1	-2.44
260	4	0	48	2	2006-05-16	2006-05-15	1	1	2	1	1	2	2	0	N			0									0	Y	3	N		N		Y	7	Y	3	N		Y	N		N		9.9	88	-2.39	1	-2.02
286	0	8	8	2	2006-07-07	2006-07-09	1	1	1	1	1	2	2	0	N			0									0	Y	7	N		N		N		N		N		N	N		N		7.5	67	-0.04	0	-0.05
307	1	8	20	1	2006-08-27	2006-08-27	2	1	1	1	1	1	1	0	N			0									0	Y	6	N		N		N		Y	6	Y	6	Y					6.9
309	0	0	0	2	2006-08-27	2006-08-28	1	1	2	1	1	2	2	0	N			0									0																		1.5	57	-10.05		-8.46
316	0	0	0	2	2006-09-09	2006-09-11	1	1	2	1	1	2	2	0	N			0									0	N		N		N		N		Y	2	N							1.6	59	-10.19		-7.81
322	7	6	90	2	2006-09-16	2006-09-16	4	1	1	1	1	1	1	0	N			0									0	Y	7	N		N		N		Y	7	N		N	N		N		20	100			1.93
323	0	0	0	2	2006-09-15	2006-09-15	1	1	2	1	1	2	2	0	N			0									0	Y	1	N		N		N		Y	2	Y	2						3.2
326	0	9	9	1	2006-09-21	2006-09-21	4	1	1	1	1	1	1	0	N			0									0	Y	3	N		N		N		Y	7	Y	2						6.1
328	1		12	2	2006-09-30	2006-09-30	1	1	1	1	1	1	1	0	N			0									0	Y	6	N		N		N		Y	6	Y	2	N	N		N		10	79	0.12	0	-0.18
380	5	6	66	2	2006-12-05	2006-12-07	3	1	1	1	1	1	1	0	N			0									0	Y	6	Y	6	N		N		N		N		Y	N		N		11	112			-6.04
317	0	0	0	2	2006-09-11	2006-09-11	1	1	2	1	1	2	2	0	Y	2006-09-11	1	1	5	1	2	1	1	2	2		0	Y	2	N		N		N		N		Y	2						2.6
361	0	2	2	2	2006-11-12	2006-11-12	1	1	1	1	1	1	2	0	Y	2006-11-12	1	1	1	1	1	1	1	1	2		0	Y	3	Y	2	Y	3	N		N		N		N	N		N		5.1
3	0	4	4	1	2006-01-02	2006-01-02	1	2	1	1	1	2	2	1	N			0									1	Y	3	N		Y	7	Y	3	Y	3	Y	3	Y	N		N		5.3	66	-4.32	2	-4.2
5	1	4	16	2	2005-12-31	2006-01-04	1	2	1	1	1	2	2	1	N			0									1	Y		N		N		Y	8	N		N		N	N		N		7	68	-1.13	0	-0.53
6	0	6	6	1	2006-01-04	2006-01-04	1	2	1	1	1	2	2	1	N			0									1	Y	3	N		Y		N		Y	3	Y	3	N	Y	MOTHERHEADACHE&BO	N		5.1	60	-1.99	0	-2.52
9	1	2	14	1	2006-01-06	2006-01-06	1	2	1	1	1	2	2	1	N			0									1	Y	3	N		Y	3	Y	3	N		N							8.6
10	4	4	52	1	2006-01-06	2006-01-06	1	2	1	1	1	2	2	1	N			0									1	Y	7	Y	1	N		N		N		N							12	99	-2.91	1	-2.77
13	0	5	5	2	2006-01-10	2006-01-10	1	2	1	1	1	2	2	1	N			0									1	Y	2	N		Y	2	Y	1	N		N		N	N		N		4	60	-4.33	2	-4.51
14	0	11	11	2	2006-01-10	2006-01-10	1	2	1	1	1	2	2	1	N			0									1	Y	3	N	3	Y	3	Y	3	Y	3	Y	3	N	N		N		8.2	68	0.62	0	0.67
15	6	7	79	2	2006-01-11	2006-01-11	2	2	1	1	1	2	1	0	N			0									0	Y	14	Y	2	N		N		N		N		N	N		N		16	89			2.22
16	3	1	37	1	2006-01-12	2006-01-11	1	2	1	1	1	2	2	1	N			0									1	Y	2	Y	2	N		N		Y	2	N		N	N		N		11	80	0.47	0	1.24
17	1	8	20	2	2006-01-12	2006-01-12	1	2	1	1	1	2	2	1	N			0									1	Y	5	N		Y	3	N		Y	3	N		N	N		N		11.4	88	-0.56	0	-0.63
18	4	2	50	1	2006-01-12	2006-01-12	1	2	1	1	1	2	2	1	N			0									1	Y	2	N		Y	2	N		Y	2	Y	2		N		N		12	92	-1.36	0	-0.93
19	0	10	10	2	2006-01-12	2006-01-12	1	2	1	1	1	2	2	1	N			0									1	Y	3	N		N		N		Y	3	N		N	N		N		8.4	59	4.26	0	4.14
20	0	6	6	1	2006-01-13	2006-01-13	1	2	1	1	1	2	2	1	N			0									1	Y	1	N		Y	1	Y	1	Y	1	Y	3	N	Y	COUGHING	N		6.7	68	-2.17	1	-2.23
21	1	0	12	1	2006-01-12	2006-01-12	1	2	1	1	1	2	2	1	N			0									1	Y	4	N		Y	1	N		Y	2	Y	2	N	N		N		7.2	73	-2.93	1	-2.84
22	0	7	7	1	2006-01-13	2006-01-13	1	2	1	1	1	2	2	1	N			0									1	Y	7	N		N		N		Y	14	Y	3						7
23	0	4	4	1	2006-01-13	2006-01-13	1	2	1	1	1	2	2	1	N			0									1	Y	2	N		N		Y	2	Y	2	N			N		N		5	61	-2.82	1	-3.06
25	1	1	13	2	2006-01-14	2006-01-14	1	2	1	1	1	2	2	1	N			0									1	Y	6	N		Y	1	N		Y	3	N							8
26	1	11	23	2	2006-01-14	2001-09-09	1	2	1	1	1	2	2	1	N			0									1	Y	3	N		Y	1	Y	1	Y	2	Y	2						8
27	2	10	34	1	2006-01-16	2006-01-16	1	2	1	1	1	2	2	1	N			0									1	Y	14	N		Y	2	Y	2	N		N		N	N		N		11	86	-1	0	-0.65
30	2	5	29	2	2006-01-17	2006-01-17	2	2	1	1	1	2	2	1	N			0									1	Y	3	N		N		N		Y	3				N		N		7.5	79	-3.4	2	-3.26
34	1	2	14	2	2006-01-18	2006-01-18	1	2	1	1	1	2	2	1	N			0									1	Y		N		N		Y	60	Y	60	Y		Y	N		N		5.1	65	-3.75	2	-3.43
35	4	5	53	2	2006-01-19	2006-01-17	1	2	1	1	1	2	2	1	N			0									1	Y	7	N		N		N		N		N		N	N		N		13	94	-0.54	0	-0.38
36	6	7	79	1	2006-01-19	2006-01-20	1	2	1	1	1	2	2	1	N			0									1	Y	90	N		N		Y	90	N		N		N	N		N		13	107			-3.95
37	2	9	33	2	2006-01-18	2006-01-18	1	2	1	1	1	2	2	1	N			0									1	Y	7			N		Y	7	Y	7			N					8.4	77	-1.58	0	-1.04
40	0	1	1	2	2006-01-20	2006-01-20	1	2	1	1	1	2	2	1	N			0									1	Y	2	N		N		N		N		N		N	N		N		3.5	50	0.47	0	-0.66
41	0	8	8	2	2006-01-22	2006-01-22	1	2	1	1	1	2	2	1	N			0									1	Y	7	N		Y	7	Y	5	Y	7	N		N	Y	MOTHERSICKREACTIVE	N		4.8	66	-4.7	2	-4.7
43	1	1	13	1	2006-01-23	2006-01-23	1	2	1	1	1	2	2	1	N			0									1	Y	9	N		N		N		Y	9	Y	5		N		N		9	66	2.14	0	2.63
44	4	2	50	1	2006-01-22	2006-01-23	1	2	1	1	1	2	2	1	N			0									1	Y	9	N		N		N		N		N		N	N		N		11	98	-3.78	2	-3.62
45	0	4	4	1	2006-01-23	2006-01-24	1	2	1	1	1	2	2	1	N			0									1	Y	2	N		N		Y	2	Y	14	Y	1	N	N		N		4
46	1	7	19	1	2006-01-23	2006-01-23	1	2	1	1	1	2	2	1	N			0									1	Y	8	N		N		N		Y	8	Y	2		N		N		7.4	60
47	1	8	20	1	2006-01-23	2006-01-23	1	2	1	1	1	2	2	1	N			0									1					Y	2	Y	2					Y					5.7	74	-5.05	2	-5.04
49	2	3	27	1	2006-01-24	2006-01-24	1	2	1	1	1	2	2	1	N			0									1	Y	1	N		N		N		Y	7	N		Y	N		N		5.2	76	-7.08	2	-6.98
52	2	1	25	2	2006-01-25	2006-01-25	1	2	1	1	1	2	2	1	N			0									1	Y	5	N		Y	2	Y	2	N		Y	5		N		N		8.6
54	0	6	6	1	2006-01-25	2006-01-25	1	2	1	1	1	2	2	1				0									1																		6.3
55	1	1	13	1	2006-01-25	2006-01-25	1	2	1	1	1	2	2	1				0									1																		9.9
56	1	1	13	1	2006-01-19	2006-01-26	1	2	1	1	1	2	2	1				0									1																				-5.72	2	-5.8
57	1	9	21	1	2006-01-24	2006-01-26	1	2	1	1	1	2	2	1	N			0									1	Y	14	N		Y	14	Y	14	N		N			N		N		8.2	77	-2.34	1	-1.84
58	1	4	16	2	2006-01-26	2006-01-26	1	2	1	1	1	2	2	1	N			0									1	Y	5	N		N		N		N		N							10
59	0	8	8	1	2006-01-27	2006-01-27	1	2	1	1	1	2	2	1	N			0									1	Y	3	N		Y	2	Y	2	Y	2	Y	2		N		N		7.5	66	-0.01	0	0.03
60	1	0	12	1	2006-01-27	2006-01-27	1	2	1	1	1	2	2	1	N			0									1	Y	7	N		N		N		Y	3	Y	3	N	N		N		7.3	68	-1.08	0	-0.76
61	0	11	11	1	2006-01-27	2006-01-27	1	2	1	1	1	2	2	1	N			0									1	Y	7	N		N		N		Y	7	Y	2	N	N		N		7.7	70	-1.11	0	-0.86
62	0	6	6	2	2006-01-25	2006-01-27	1	2	1	1	1	2	2	1	N			0									1	N		N		Y	2	Y	2	Y	1	N		N	N		N		6.2	67	-2.22	1	-2.29
63	0	10	10	1	2006-01-26	2006-01-28	1	2	1	1	1	2	2	1	N			0									1	Y	3	N		N		Y	3	Y	3	N		N	N		N		6.4	68	-2.77	1	-2.66
64	0	5	5	2	2006-01-27	2006-01-27	1	2	1	1	1	2	2	1	N			0									1	Y	10	N		Y	10	Y	10	Y	10	Y	10	N	N		N		5.9
65	2	2	26	2	2006-01-20	2006-01-27	1	2	1	1	1	2	2	1	N			0									1	Y	7	N		Y	3	N		Y	3	N		N	N		N		8.8	70	0.63	0	1.59
68	2	2	26	2	2006-01-25	2006-01-30	1	2	1	1	1	2	2	1	N			0									1	Y	3	N		N		N							N		N		6	74	-4.7	2	-4.41
71	2	1	25	1	2006-01-23	2006-01-30	1	2	1	1	1	2	2	1	N			0									1	Y		N		N		Y	30	Y	3	N		N	N		N		10	75	0.43	0	1.34
75	0	6	6	1	2006-01-30	2006-01-31	1	2	1	1	1	2	2	1	N			0									1	Y	2	N		N		N		Y	2	N		N	N		N		6	66	-2.83	1	-2.88
76	2	5	29	2	2006-01-31	2006-02-01	1	2	1	1	1	2	2	1	N			0									1	Y	3	Y	1	Y	1	N		Y		N							9
77	1	4	16	2	2006-02-01	2006-02-01	1	2	1	1	1	2	2	1	N			0									1	Y	2	N		N		Y	2	Y	2	Y	1	N	N		N		9.3	78	-0.48	0	-0.42
79	1	11	23	2	2006-02-01	2006-02-01	1	2	1	1	1	2	2	1	N			0									1	Y	7	N		N		Y	2	Y	7	N		N	Y	MALARIA	N		9	82	-1.8	0	-1.73
81	1	0	12	2	2006-01-17	2006-02-03	1	2	1	1	1	2	2	1	Y	2006-01-18	5	0									1	Y	7	N		N		N		Y	7	Y	5	N	N		N		11	76	1.77	0	1.73
82	1	0	12	2	2006-02-04	2006-02-04	1	2	1	1	1	2	2	1	N			0									1	Y	2	N		N		N		N		N		N	N		N		8.6	72	0.04	0	0.19
83	1	8	20	1	2006-02-03	2006-02-03	1	2	1	1	1	2	2	1	Y	2006-02-03	5	0									1	Y	14	N		Y	2	Y	1	Y	28			Y	N		N		9.5	76	-0.26	0	0.4
84	1	4	16	1	2006-02-02	2006-02-05	1	2	1	1	1	2	2	1	N			0									1	Y	14	N		N		N		N		N			N		N		8.3	76	-1.93	0	-1.64
89	3	7	43	1	2006-02-08	2006-02-06	1	2	1	1	1	2	2	1	N			0									1	Y	5	N		N		N		N		N		Y	N		N		11	89	-1.78	0	-1.3
90	0	6	6	2	2006-02-06	2006-02-07	1	2	1	1	1	2	2	1	N			0									1	Y	1	N		N		N		N		Y							6
91	1	9	21	2	2006-02-09	2006-02-09	1	2	1	1	1	2	2	1	N			0									1	Y	2	N		N		N		Y	3	N		N	N		N		6.9	80	-4.37	2	-4.45
92	0	0	0	1	2006-02-09	2006-02-09	1	2	1	1	1	2	2	1	N			0									1	Y	3	N		N		N		N		N			N		N		2.5
93	0	8	8	1	2006-02-06	2006-02-09	1	2	1	1	1	2	2	1	N			0									1	Y	7	N		N		N		N		N			N		N		7	70	-2.32	1	-2.34
95	1	7	19	1	2006-02-09	2006-02-11	1	2	1	1	1	2	2	1	N			0									1	Y	4	N		Y	3	N		Y	3	N		N	N		N		11	89	-1.6	0	-1.89
96	2	0	24	2	2006-02-12	2006-02-12	1	2	1	1	1	2	2	1	N			0									1	Y	3	N		N		N		Y	3	N		N	N		N		9.4	84	-1.98	0	-2
100	1	10	22	1	2006-02-10	2006-02-10	1	2	1	1	1	2	2	1	N			0									1	Y	5	N		N		N		Y	3	N		Y	N		N		9	79	-1.62	0	-1.21
101	1	4	16	2	2006-02-11	2006-02-11	1	2	1	1	1	2	2	1	N			0									1	Y	5	N		N		N		Y	5	Y	5	N	N		N		8.1	73	-0.89	0	-0.48
102	1	10	22	1	2006-02-10	2006-02-11	2	2	1	1	1	2	2	1	Y	2006-02-13	5	0									1	Y	7	N		N		Y	2	Y	6	Y	1	N	N		N		9.5	81	-1.39	0	-1.14
103	6	7	79	1	2006-02-10	2006-02-13	1	2	1	1	1	2	2	1	N			0									1	Y	7	N		Y	7	N		Y	2	Y	4	Y	N		N		14.7	99			-0.31
104	7	8	92	1	2006-02-12	2006-02-13	1	2	1	1	1	2	2	1	N			0									1	Y	3	N		N		N		N		N			N		N		24
105	0	8	8	2	2006-02-14	2006-02-14	1	2	1	1	1	2	2	1				0									1																		5.2
107	12	5	149	1	2006-02-16	2006-02-16	1	2	1	1	1	2	2	1	N			0									1	Y	2	N		N		N		Y	0	N		Y	N		N		36	136			0.67
108	0	0	0	1	2006-02-16	2006-02-16	1	2	1	1	1	2	2	1	N			0									1	Y	3	N		Y	1	N		Y	3	N		Y	Y	FATHER-MALARIA	N		3.5	44			2.65
109	0	6	6	1	2006-02-16	2006-02-16	1	2	1	1	1	2	2	1	Y	2006-02-17	5	0	5								1	Y	3	N		N		N		Y	3	N		N	Y	SISTERHASDIARRHOEA	Y	ONANDOFFDIARRHOEA	4	57	-3.05	2	-4.19
110	2	1	25	1	2006-02-16	2006-02-16	1	2	1	1	1	2	2	1	Y	2006-02-16	5	0	1								1	Y	1	Y	1	N		N		Y	2	Y							8.2
112	0	8	8	2	2006-02-15	2006-02-16	1	2	1	1	1	2	2	1	N			0									1	Y	7	N		Y	3	Y	7	Y	90	N		Y					5
117	9	0	108	1	2006-02-19	2006-02-19	1	2	1	1	1	2	2	1	N			0									1	Y	7	N		N		N		N		N		Y	N		N		14	102			-2.04
119	0	11	11	1	2006-02-13	2006-02-17	1	2	1	1	1	2	2	1	N			0									1	Y	4	N		N		N		N		N							9
120	0	0	0	1	2006-02-19	2006-01-19	1	2	1	1	1	2	2	1	N			0									1	Y	1	N		Y	1	Y	1	N		N			N		N		4.4	52	1.74	0	2.08
122	1	0	12	1	2006-02-18	2006-02-20	1	2	1	1	1	2	2	1	N			0									1	Y	2	N		N		N		Y	3	Y	3		Y	BROTHERHASCHRONIC	N		7.4	63	1.05	0	1.35
123	1	8	20	1	2006-02-20	2006-02-21	1	2	1	1	1	2	2	1	N			0									1	Y	3	N		N		N		Y	3	N		Y	N		N		6.5	73	-4.16	2	-3.62
127	0	10	10	2	2006-02-22	2006-02-22	1	2	1	1	1	2	2	1	N			0									1	Y	3	N		N		N		Y	2	Y	7						6.6
128	1	8	20	2	2006-02-22	2006-02-22	1	2	1	1	1	2	2	1				0									1																		9.9
131	0	0	0	1	2006-02-16	2006-02-22	1	2	1	1	1	2	2	1	N			0									1	Y	3	N		N		N		N		Y		N	N		N		1.9	44			-2.99
132	2	6	30	1	2006-02-18	2006-02-24	1	2	1	1	1	2	2	1	N			0									1	Y	30	N		N		N		Y	3	Y		Y					8	76	-2.58	1	-1.72
133	0	8	8	1	2006-02-24	2006-02-24	1	2	1	1	1	2	2	1				0									1																		8
134	5	11	71	1	2006-02-24	2006-02-24	1	2	1	1	1	2	2	1	N			0									1	Y	3	N		Y	2	N		Y	3	N		Y	N		N		14	100			-1.07
135	0	11	11	1	2006-02-24	2006-02-24	1	2	1	1	1	2	2	1	N			0									1	Y	2	Y	2	Y	1	N		Y	3	N		N	N		N		8	70	-0.63	0	-0.42
136	0	8	8	1	2006-02-24	2006-02-24	1	2	1	1	1	2	2	1	N			0									1	Y	14	N		N		N		Y	21	N		N	N		N		7.2	67	-0.89	0	-0.91
138	0	11	11	1	2006-02-24	2006-02-27	1	2	1	1	1	2	2	1	Y	2006-02-25	5	0									1	Y	14	Y	7	N	0	Y	2	Y	14	Y	7		Y	OTITISMEDIAANDFEV	N		9	77	-1.16	0	-1.34
139	1	11	23	1	2006-02-27	2006-02-27	1	2	1	1	1	2	2	1	N			0									1	Y	14	N		Y	14	Y	14	Y	14	N		Y	N		N		8	79	-3.13	2	-2.82
140	7	11	95	1	2006-02-27	2006-02-28	1	2	1	1	1	2	2	1	N			0									1	Y	7	N		N		Y	2	N		N		N	N		N		20	118			-1.02
141	1	0	12	2	2006-02-28	2006-02-28	1	2	1	1	1	2	2	1	N			0									1	Y	3	N		Y	2	N		Y	3	Y	3	Y	N		N		6.1	69	-3.07	2	-2.86
143	1	2	14	1	2006-02-26	2006-03-01	1	2	1	1	1	2	2	1				0									1
148	0	6	6	1	2006-02-27	2006-03-02	1	2	1	1	1	2	2	1	N			0									1	Y	7	N		N		Y	2	N		N			N		N		5	66	-4.96	2	-4.95
149	1	1	13	2	2006-03-01	2006-03-02	1	2	1	1	1	2	1	0	N			0									0	Y	3	N		N		N		Y	3	N							6.9
150	1	8	20	2	2006-02-28	2006-03-02	1	2	1	1	1	2	1	0				0									0																		9.2
151	3	8	44	1	2006-03-02	2006-03-02	1	2	1	1	1	2	2	1	N			0									1	Y	7	N		Y	2	Y	2	Y	7	N		Y	N		N		9	83	-2.76	1	-2.06
152	1	9	21	1	2006-02-28	2006-02-28	1	2	1	1	1	2	2	1	Y	2006-02-28	5	0	5								1	Y	3	N		Y	1	N		Y	3	N		Y	N		N		9.3
153	6	9	81	1	2006-03-05	2006-03-02	1	2	1	1	1	2	1	0	N			0									0	Y	30	N		N		N		Y	30	N		Y	N		N		15	106			-1.77
154	0	10	10	1	2006-03-03	2006-03-03	1	2	1	1	1	2	2	1	N			0									1	Y		N		N		N		Y	3	Y	3	N	N		N		6.5	70	-3.28	2	-3.2
155	0	5	5	2	2006-03-03	2006-03-05	1	2	1	1	1	2	2	1	N			0									1	Y	3	N		N		Y	3	Y	3	N			N		N		6.5
161	2	9	33	2	2006-03-06	2006-03-07	1	2	1	1	1	2	2	1	N			0									1	Y	14	N		Y	4	Y	14	Y	14	N		Y	N		N		5.92	79	-5.77	2	-5.82
162	1	5	17	2	2006-03-08	2006-03-08	1	2	1	1	1	2	2	1	N			0									1
163	0	9	9	2	2006-03-09	2006-03-09	1	2	1	1	1	2	2	1	N			0									1	Y	1	N		N		N		Y	1	Y	7	N	N		N		6.2	68	-2.55	1	-2.54
164	1	10	22	1	2006-03-06	2006-03-06	2	2	1	1	1	1	1	0	N			0									0	Y	7	N		N		N		N		N			N		N		10	89	-2.86	1	-3.11
165	0	11	11	1	2006-03-08	2006-03-08	1	2	1	1	1	2	2	1	N			0									1	Y	2	N		N		N		Y	14	N			N		N		10.6
166	1	0	12	2	2006-03-10	2006-03-10	1	2	1	1	1	2	2	1	N			0									1	Y	5	N		Y	5	Y	1	Y	3	N		Y	N		N		6.5	70	-2.63	1	-2.44
172	1	6	18	2	2006-03-14	2006-03-14	1	2	1	1	1	2	2	1	N			0									1	Y	5	N		Y	5	Y	5	Y	6	Y	3	N	N		N		8.1	73	-0.89	0	-0.38
175	11	5	137	2	2006-03-14	2006-03-14	1	2	1	1	1	2	2	1	N			0									1	Y	4	N		Y	3	N		Y	4	N		Y	N		N		25	128			-1.21
176		1	1	1	2006-03-15	2006-03-15	1	2	1	1	1	2	2	1	N			0									1
178	0	4	4	2	2006-03-15	2006-03-15	1	2	1	1	1	2	2	1	N			0									1	Y	1	N		N		Y	14	Y	14	Y	1						2.4
179	4	0	48	2	2006-03-16	2006-03-16	1	2	1	1	1	2	2	1	N			0									1	Y	4	N		Y	3	N		N		N							15.5
180	0	10	10	2	2006-03-17	2006-03-17	1	2	1	1	1	2	2	1	Y	2006-03-20	5	0	5								1	Y	9	N		N		N		N		N		N	N		N		7
182	0	4	4	1	2006-03-19	2006-03-19	1	2	1	1	1	2	2	1	N			0									1	Y	3	N		Y	3	Y	3	Y	7	Y	1	N	Y		Y		4.6
183	1	9	21	1	2006-03-16	2006-03-17	1	2	1	1	1	2	2	1	N			0									1	Y	3	N		N		N		Y	3	N		Y	N		N		7.1	73	-3.11	2	-2.62
184	0	10	10	2	2006-03-20	2006-03-20	1	2	1	1	1	2	2	1	Y	2006-03-20	5	0	5								1	Y	3	N		Y	1	N							N		N		6.2	66	-1.86	0	-1.73
186	1	10	22	2	2006-03-17	2006-03-20	1	2	1	1	1	2	2	1	Y	2006-03-21	5	0	5								1	Y	7			N		N		Y	7	N							6	74	-4.55	2	-4.26
188	2	0	24	2	2006-03-22	2006-03-22	1	2	1	1	1	2	2	1	N			0									1	Y	14			N		N				Y	2						13.1
189	1	2	14	1	2006-03-22	2006-03-22	1	2	1	1	1	2	2	1	N			0									1	Y	4	N		N		N		Y	3	Y	2		N		N		8.5	77	-1.88	0	-1.85
193	2	1	25	1	2006-03-23	2006-03-23	1	2	1	1	1	2	2	1	Y	2006-03-23	5	0	5								1	Y	2	N		N		N		Y	2	Y	1		Y	NEPHEW1YROLDHAS	N		9.1	85	-3.18	2	-3.23
194	0	11	11	2	2006-03-24	2006-03-24	1	2	1	1	1	2	2	1	N			0									1	Y	7	N		Y	7	N		Y	7	Y	7	N	N		N		5.8	67	-3.01	2	-2.84
198	2	6	30	1	2006-03-24	2006-03-25	1	2	1	1	1	2	2	1	N			0									1	Y	7	N		N		N		Y	7	N							13.1
201	7	0	84	1	2006-03-26	2006-03-26	1	2	1	1	1	2	2	1	N			0									1	Y	3	N		Y	4	N		Y	3	N		Y	N		N		16
202	0	5	5	2	2006-03-25	2006-03-25	1	2	1	1	1	2	2	1	N			0									1	Y	4	N		N		Y	4	Y	1	Y	1		N		N		6.3	66	-1.68	0	-1.68
203	0	8	8	1	2006-03-24	2006-03-27	1	2	1	1	1	2	2	1	N			0									1	Y	3	N		Y	3	N		Y		N		N	N		N		6	66	-2.83	1	-2.86
204	3	4	40	2	2006-03-27	2006-03-27	1	2	1	1	1	2	2	1	N			0									1	Y	4	N		Y	2	N		Y	120	Y	120	Y	N		N		10.3	84	-0.9	0	-0.57
210	3	0	36	2	2006-03-30	2006-03-30	1	2	1	1	1	2	2	1	N			0									1	Y		N		N		N		Y	3	N							9.6
211	1	4	16	2	2006-03-24	2006-03-31	1	2	1	1	1	2	2	1	N			0									1	Y	7	N		N		N		Y	7	Y	7	N	N		N		8.34	78	-1.74	0	-1.75
213	0	8	8	2	2006-04-03	2006-04-04	1	2	1	1	1	2	2	1	N			0									1	Y	30	N		N		N		N		N		N	N		N		5.1	68	-4.68	2	-4.7
215	1	6	18	1	2006-04-04	2006-04-04	1	2	1	1	1	2	2	1	N			0									1	N		Y	1	Y	2	N				Y	1						8.2	75	-1.83	0	-1.27
216	2	2	26	1	2006-04-03	2006-04-04	2	2	1	1	1	2	2	1	N			0									1	Y	7	N		Y	4	Y	7	Y	7	N		N	Y	COUSIN2YRSHASKWAS	N		8.5	85	-4	2	-4.06
217	1	11	23	1	2006-04-03	2006-04-03	1	2	1	1	1	2	2	1	N			0									1	Y	2	N		Y	1	N		Y	2	Y							10.7
218	1	11	23	1	2006-03-31	2006-04-04	1	2	1	1	1	2	2	1	N			0									1	N		N		Y	7	Y	2	N				Y					6.5	75	-4.64	2	-4.23
219	5	8	68	1	2006-04-05	2006-04-05	1	2	1	1	1	2	2	1	N			0									1	Y	14	N		N		N		Y	14	Y	14	N	N		N		14.4	108			-2.74
220	6	11	83	2	2006-04-05	2006-04-05	1	2	1	1	1	2	2	1	N			0									1	Y	3	N		Y	7	Y	7	Y	7	N		Y	N		N		12.6	102			-2.61
221	0	10	10	1	2006-03-29	2006-04-07	1	2	1	1	1	2	2	1	N			0									1	Y	7	N		Y	3	Y	2	N		N		N	N		N		9	70	0.8	0	0.97
222	1	4	16	1	2006-04-04	2006-04-10	1	2	1	1	1	2	2	1	N			0									1	Y	2	N		N		Y	21	Y	2	N		Y	N		N		6	72	-4.78	2	-4.47
223	1	0	12	1	2006-04-09	2006-04-11	1	2	1	1	1	2	2	1	N			0									1	Y	3	N		N		N		Y	3	N		N	N		N		12.8	78	2.75	0	2.55
224	0	10	10	2	2006-04-06	2006-04-10	1	2	1	1	1	2	2	1	N			0									1	Y	7	N		Y	7	Y	3	Y	7	Y	7	Y	N		N		5.6	65	-2.69	1	-2.61
227	2	9	33	2	2006-04-15	2006-04-17	1	2	1	1	1	2	2	1	N			0									1	Y	21	N		N		N		Y	7	Y			N		N		8.3	79	-2.19	1	-1.84
229	0	7	7	2	2006-04-18	2006-04-18	3	2	2	1	1	2	2	1	N			0									1	Y	2	N		Y	1	Y	1	Y	2	N		Y	N		N		4.2	58	-2.78	1	-3.44
232	1	0	12	1	2006-04-19	2006-04-21	1	2	1	1	1	2	2	1	N			0									1	Y	5	N		N		N		Y	5	N		N	N		N		5.3	65	-3.95	2	-3.73
234	4	0	48	2	2006-04-23	2006-04-23	1	2	1	1	1	2	2	1	Y	2006-04-23	5	0	5								1	Y	1	N		N		N		Y	1	Y	1	Y	N		N		12	92	-1.04	0	-0.81
236	0	2	2	2	2006-04-25	2006-04-25	1	2	1	1	1	2	2	1	N			0									1
239	1	11	23	1	2006-04-27	2006-04-28	1	2	1	1	1	2	2	1	N			0									1	Y	5	N		N		N		Y	5	N		Y	N		N		7.4	75	-3.14	2	-2.47
240	7	3	87	1	2006-04-27	2006-04-27	4	2	1	1	1	2	1	0	N			0									0	Y	9	N		N		N		Y	9	N		N			N		16.5	105			-0.43
241	1	4	16	1	2006-04-30	2006-04-30	1	2	1	1	1	2	2	1	N			0									1	Y	1	N		N		Y	1	Y	1	Y	1						6.8
242	2	8	32	1	2006-04-30	2006-04-30	1	2	1	1	1	2	2	1	N			0									1	Y	1	Y	1	N		N		N		N		N	N		N		12	89	-0.66	0	-0.47
243	3	9	45	2	2006-04-30	2006-04-30	1	2	1	1	1	2	2	1	N			0									1	Y	1	N		N		N		Y	1	Y	1						14
244	3	9	45	1	2006-04-30	2006-04-30	1	2	1	1	1	2	2	1	N			0									1	Y	1	N		N		N		Y	1	Y	1						14.5
245	0	10	10	1	2006-05-02	2006-05-02	1	2	1	1	1	2	2	1	N			0									1	Y												N	N		N		5.7	68	-4.18	2	-4.07
246	2	6	30	1	2006-04-30	2006-05-02	1	2	1	1	1	2	2	1	N			0									1	N		N		N		Y	1	Y	7								7.3	78	-4.14	2	-3.64
248	0	4	4	1	2006-05-03	2006-05-03	1	2	1	1	1	2	2	1	N			0									1	Y	1	N		N		N		Y	7	N		Y	N		N		5.9	59	0.39	0	-0.16
249	2	3	27	1	2006-05-01	2006-05-04	1	2	1	1	1	2	2	1	N			0									1	Y	3	N		N		N		N		Y	2		N		N		11.1	85	-0.62	0	-0.44
253	3	5	41	2	2006-05-08	2006-05-08	1	2	1	1	1	2	2	1	N			0									1	Y		N		Y	7	N		Y	4	Y	4	Y	N		N		10	81	-0.5	0	-0.05
255	1	5	17	2	2006-05-07	2006-05-09	1	2	1	1	1	2	2	1	N			0									1	Y	5	N		Y	6	Y	4	N		N		N	Y	HEADACHE(SISTER)	N		8.4	73	-0.48	0	0.02
256	0	4	4	1	2006-05-10	2006-05-11	1	2	1	1	1	2	2	1	N			0									1	N		N		Y	1	N		Y	5	N		Y	N		N		5
257	2	3	27	2	2006-05-11	2006-05-11	1	2	1	1	1	2	2	1	N			0									1	Y	14	N		N		N		N		Y	6		N		N		10
258	1	0	12	1	2006-05-15	2006-05-15	1	2	2	2	1	2	2	1	N			0									1	Y	5	N		Y	5	N		Y	7	N		Y	N		N		6.6	68	-2.37	1	-2.02
261	0	11	11	1	2006-05-09	2006-05-19	1	2	1	1	1	2	2	1	N			0									1	N				N		N		Y				Y	Y	MOTHERANAEMIA&VOM			6.4	66	-1.99	0	-1.76
263	1	1	13	1	2006-05-20	2006-05-25	1	2	1	1	1	2	2	1	N			0									1	Y	5	Y	1	Y	1	Y	1	N		N			N		N		8.7	78	-1.82	0	-1.94
265		7	7	1	2006-05-26	2006-05-26	1	2	1	1	1	2	2	1	N			0									1																		6.4
266	0	10	10	1	2006-05-26	2006-05-26	1	2	1	1	1	2	2	1	N			0									1	Y	7	N		N		N		N		N		Y	N		N		7.7	70	-1.11	0	-0.98
267	7	2	86	1	2006-05-29	2006-05-29	1	2	1	1	1	2	2	1	N			0									1	Y	14	N		Y	14	Y	14	Y	240	N		Y	N		N		14.2	108			-3.12
269		8	8	1	2006-06-03	2006-06-03	1	2	1	1	1	2	2	1	Y	2006-06-03	5	0									1	Y	3	N		N		N		Y	3	Y	2	N	N		N		8.2
270	1	11	23	1	2006-06-03	2006-06-03	1	2	1	1	1	2	2	1	N			0									1	Y	5	N		N		Y	1	Y	3	N		Y	N		N		9.1	77	-1.02	0	-0.35
271	3	6	42	2	2006-06-06	2006-06-06	1	2	1	1	1	2	2	1	N			0									1	Y	3	N		Y	1	N		N		Y		Y	N		N		10.4	81	-0.05	0	0.39
272	1	3	15	1	2006-06-05	2006-06-06	1	2	1	1	1	2	2	1	N			0									1	Y	5	N		Y	4	Y	5	N		N		Y	N		N		7.6	70.9	-1.57	0	-1.07
273	0	7	7	1	2006-06-07	2006-06-07	1	2	1	1	1	2	2	1	N			0									1	Y	11			Y	3	Y	10	Y	10			Y	Y	MOTHER?MALARIA			3.2	55.4	-4.47	2	-5.94
274	2	4	28	1	2006-06-12	2006-06-12	1	2	1	1	1	2	2	1	N			0									1	Y	7	N		Y	1	N		Y	3	Y	2	N	N		N		10.5	85	-1.32	0	-1.13
275	2	0	24	2	2006-06-13	2006-06-13	1	2	1	1	1	2	2	1	N			0									1	Y	14	N		Y	7	Y		Y	14	N		Y	Y	FATHERHASSWOLLENL	N		6.8	73.5	-3.26	2	-2.76
277	1	11	23	1	2006-06-14	2006-06-14	1	2	1	1	1	2	2	1	N			0									1	Y	7	N		N		N		Y	7	Y	3	N	N		N		10.5	78	0.48	0	1.13
279	7	0	84	1	2006-06-21	2006-06-21	1	2	1	1	1	2	2	1	Y	2006-06-27	5	0	5								1	Y	14	N		N		N		Y	14	Y	14	Y	N		N		16.8	103			0.23
282		10	10	1	2006-06-21	2006-06-23	1	2	1	1	1	2	2	1	N			0									1																		8.8
287	1	6	18	1	2006-07-06	2006-07-10	1	2	1	1	1	2	2	1	N			0									1	Y	7	N		Y	5	Y	4	Y	4	N		Y	N		N		8.5	75	-1.37	0	-0.84
289	2	11	35	2	2006-07-20	2006-07-20	1	2	1	1	1	2	2	1	N			0									1	Y	6	N		N		Y	6	N		N		Y	N		N		10	80	-0.26	0	0.17
294	0	0	0	1	2006-08-03	2006-08-03	1	2	1	1	1	2	2	1	Y	2006-08-03	5	0	5								1	N		N		N		Y	2	Y	2	N		N	N		N		1.8
299	2	7	31	1	2006-08-06	2006-08-18	2	2	1	1	1	2	2	1	N			0									1	Y	2	N		N		N		Y	30	Y	1	Y	N		N		8.7	77	-1.75	0	-0.92
302	0	10	10	1	2006-08-17	2006-08-22	2	2	1	1	1	2	2	1	N			0									1	Y	2	N		N		Y	30	Y	2			Y	N		N		6.3	67.8	-2.9	1	-2.75
303	15	0	180	2	2006-08-23	2006-08-23	1	2	1	1	1	2	2	1	N			0									1	Y	14	N		N		Y	1	Y		Y	1	Y	N		N		27	136			-2.85
310	1	0	12	1	2006-08-28	2006-08-29	1	2	1	1	1	2	2	1	N			0									1	Y	5			N		Y	30	Y	4			Y					8.1	72.2	-1.18	0	-0.97
312	1	0	12	1	2006-08-31	2006-08-31	1	2	1	1	1	2	2	1	N			0									1	Y	6	N		N		N		Y	6	Y	3		N		N		9.2	72	0.44	0	0.72
319	6	6	78	2	2006-09-12	2006-09-12	1	2	1	1	1	2	2	1	N			0									1	N		Y	1	Y	1	N		N		N		N	N				15	104			-1.01
320	0	11	11	2	2006-08-21	2006-09-15	1	2	1	1	1	2	2	1	N			0									1	Y	7	N		N		N		Y	30	N		Y	N				5.7	68	-3.53	2	-3.43
321	1	4	16	1	2006-09-15	2006-09-15	1	2	1	1	1	2	2	1	N			0									1	Y	3	N		Y	2	Y	2	Y	2	N		Y	N		N		5.9	79	-6.35	2	-6.69
327	1	1	13	2	2006-09-26	2006-09-26	1	2	1	1	1	2	2	1	N			0									1	Y	4	N		Y	3	Y	2	N		Y	2	N	N		N		9.5	70	1.63	0	2.01
330	0	3	3	2	2006-10-02	2006-10-02	1	2	1	1	1	2	2	1	N			0									1	Y	2	N		N		N		Y	2	Y	2						5.2
335	6	0	72	2	2006-10-06	2006-10-07	1	2	1	1	1	2	2	1	N			0									1	Y	60	N		N		N		N		N		N					16.2
338	1	3	15	1	2006-10-11	2006-10-11	1	2	1	1	1	2	2	1	N			0									1	Y	5	N		N		N		Y	4	Y	4		N		N		9	69	1.33	0	1.84
340	0	10	10	2	2006-10-13	2006-10-13	2	2	1	1	1	2	2	1	N			0									1	Y	5	N		Y	1	N		Y	5	Y	3	Y	N		N		6.1	65	-1.68	0	-1.66
346	1	2	14	1	2006-10-17	2006-10-18	1	2	1	1	1	2	2	1	Y	2006-10-24	6	0		2		1			2		1	Y	21											Y	N		N		6.5	74.5	-4.52	2	-4.49
348	0	8	8	1	2006-10-26	2006-10-26	1	2	1	1	1	2	2	1	Y	2006-10-28	5	0	5								1	Y	3	N		N		Y	1	Y	3	Y	3		N		N		6.5
349	0	11	11	2	2006-10-24	2006-10-26	1	2	1	1	1	2	2	1	N			0									1	Y	2	Y	1	Y		Y		N		N		N	N		N		7	69	-1.45	0	-1.29
357	2	10	34	1	2006-11-07	2006-11-07	1	2	1	1	1	2	1	0	Y	2007-11-07	6	0		2		1			2		0	Y	14	N		N		N		Y	2	Y	2	N					11
362	0	7	7	2	2006-11-15	2006-11-15	2	2	1	1	1	2	2	1	N			0									1	Y	30	N		N		N		Y	30	Y	3	Y	N		N		5.9	79	-5.67	2	-6.04
363	6	1	73	2	2006-11-20	2006-11-20	1	2	1	1	1	2	2	1				0									1	N		N		N		N		N		N			N		N		16	108			-1.12
364	6	2	74	2	2006-11-17	2006-11-19	1	2	1	1	1	2	2	1	N			0									1																		15
367	2	5	29	1	2006-11-20	2006-11-20	1	2	1	1	1	2	2	1	N			0									1	Y	5	N		Y	5	Y	5	Y	5	N		Y	N		N		9	79	-1.78	0	-1.18
370	1	6	18	1	2006-11-27	2006-11-27	1	2	1	1	1	2	2	1	N			0									1	Y	2	N		N		N		N		N		N	N		N		10
371	0	6	6	2	2006-11-09	2006-11-28	1	2	1	1	1	2	2	1	N			0									1	N		N		Y	5	Y	6	Y	1	N		N	N		N		4.4	59	-2.8	1	-3.29
372	0	10	10	1	2006-11-29	2006-11-29	1	2	1	1	1	2	2	1	N			0									1	Y	3	N		N		Y	3	Y	3	Y	2	N	N		N		6	62	-1.03	0	-1.06
373	3	7	43	1	2006-11-27	2006-11-30	2	2	1	1	1	2	2	1	Y	2006-11-27	5	0	5								1	Y	4	Y	2	Y	1	N		Y	4	N		N	N		N		11.2	113	-6.01	2	-6.54
376	0	7	7	1	2006-12-06	2006-08-06	1	2	1	1	1	2	2	1	N			0									1	Y	3	N		Y	2	N		Y	3	Y	3	N	N		N		6.6
377	3	11	47	1	2006-12-06	2006-12-06	1	2	1	1	1	2	2	1	N			0									1	Y	30	N		N		Y	30	Y	7	N		Y	N		N		12	89	-0.66	0	-0.15
378	1	5	17	2	2006-12-08	2006-12-08	1	2	1	1	1	2	2	1	N			0									1	Y	2	N		N		N		Y		N		Y	N		N		8.5	79	-1.74	0	-1.74
379	3	7	43	2	2006-12-08	2006-12-08	1	2	1	1	1	2	2	1	N			0									1	Y	30	N		Y	3	N		Y	7	Y	7	Y	N		N		9.1	85	-2.64	1	-2.31
381	0	9	9	2	2006-12-08	2006-12-09	1	2	1	1	1	2	2	1	N			0									1	Y	3	N		Y	3	N		Y	3			Y					6.6	69	-2.13	1	-2.12
382	0	1	1	1	2006-12-11	2006-12-11	1	2	1	1	1	2	2	1	N			0									1																		2.7
387	1	5	17	1	2006-12-11	2006-12-18	1	2	1	1	1	2	2	1	N			0									1	Y	21	N		Y	1	N				Y	3	Y					8.2	73	-1.26	0	-0.64
389	1	2	14	1	2006-12-18	2006-12-18	1	2	1	1	1	2	2	1	N			0									1	Y	4	Y	1	N		N		Y	4	Y	3	Y	N		N		6.2	68	-3.18	2	-2.78
390	0	7	7	1	2006-12-20	2006-12-20	1	2	1	1	1		2	0	N			0									0	Y	14	N		N		N		Y	14	N			N		N		5.5
391	0	9	9	1	2006-12-23	2006-12-23	1	2	1	1	1	2	2	1	N			0									1			N		N		N				Y	240	Y					7.6
393	2	4	28	1	2006-12-20	2001-09-09	1	2	1	1	1	2	2	1	N			0									1																		10
106	1	0	12	2	2006-02-09	2006-02-14	1	2	1	1	1	2	2	1	Y	2006-02-14	1	1	9	2	1	1	1	2	2	1	1	Y	8	Y	1	Y	3	N		Y	5	N		N	N		N		7.5	70	-0.95	0	-0.75
157	2	1	25	2	2006-03-06	2006-03-06	1	2	1	1	1	2	1	0	Y	2006-03-06	1	1	1	2	1	1	1	2	1	0	0	Y	6	Y	1	Y	1	N		Y		Y	1						8.3
205	0	7	7	1	2006-03-28	2006-03-28	1	2	1	1	1	2	2	1	Y	2006-03-28	1	1	1	2	1	1		2	2	1	1	Y	4	N		Y	3	N		Y	3	Y	1						6
360	0	1	1	1	2006-11-11	2006-11-11	1	2	1	1	1	2	2	1	Y	2006-11-11	1	1	1	2	1	1	1	2	2	1	1	Y	3	N		N		N		N		N							2.9
38	2	0	24	2	2006-01-19	2006-01-20	1		1	1	1	1	1		N			0										Y	7	N		N		N		N		N		N	N		N		10	78	0.19	0	0.54
48	5	0	60	2	2006-01-12	2006-01-23	1								N			0										N		N		N		Y	30	N		N							16
121	0	3	3	2	2006-02-20	2006-02-20	1								N			0										Y	30	N		Y		Y		N		N							3.6
169	10	1	121	2	2006-03-13	2006-03-13	1		1	1	1	2	2		Y	2006-03-15	5	0										Y	5	N		N		N		Y		N							14
29	0	8	8	2	2006-01-10	2006-01-15									Y	2006-01-11	1	1	5	1	2	2	2	1	1	0	0	Y	7	N		N		N		Y	5	Y	3	N	Y	THEMOTHERHASON&	N		5.4
126	1	0	12	1	2006-02-18	2001-09-09									Y	2006-02-20	1	1	1	2	1	1	1	2	2	1	1	Y	30	N		Y	4	N		Y	7	N		Y	N		N		8.2	75	-1.83	0	-1.74
156	0	0	0	2	2006-03-04	2001-09-09									Y	2006-03-04	1	1	5	2	1	1	1	2	2	1	1	Y	3	N		N		N		N		Y	2						2.6
158	0	0	0	2	2006-03-04	2001-09-09									Y	2006-03-05	1	1	5	2	1	1	1	2	2	1	1	N		N		N		N		N		N							4
259	0	2	2	1	2006-05-14	2001-09-09									Y	2006-05-15	1	1	1	2	1	1	1	2	2	1	1	Y	1	N		N		N		Y		N		N	N		N		4.6	58	-2	1	-2.31
369	0	7	7	1	2006-11-25										Y	2006-11-25	1	1	1	2	1	1	1	2	2	1	1	Y	2	N		Y	2	Y	2	Y	2	Y	2	N	N		N		6.9	68	-1.8	0	-1.83
[truncated: 65 more columns]
